# Supplementary material for: Structural insights into the activity and regulation of human Josephin-2
Source: PubMed Central journal article supplement (PMC7337049; doi:10.1016/j.yjsbx.2019.100011), 2019-08-21
Supplement: mmc1.pdf [file mmc1.pdf]

## SUPPLEMENTARY DATA

### Structural insights into the activity and regulation of human Josephin-2

Kimberly C. Grasty<sup>a</sup>, Stephen D. Weeks<sup>a,1</sup>, Patrick J. Loll<sup>\*a</sup>

<sup>a</sup> Department of Biochemistry and Molecular Biology, Drexel University College of Medicine, Philadelphia, PA USA 19102

<sup>1</sup> Present address: OrthogonX, Gaston Geenslaan 1, 3000, Leuven, Belgium

\* Corresponding author: Patrick J. Loll  
Department of Biochemistry and Molecular Biology  
Drexel University College of Medicine  
Mailstop 497  
Philadelphia, PA USA 19102  
pjl28@drexel.edu  
Telephone: 1 (215) 762-7706  
Fax: 1 (215) 762-4452

A.

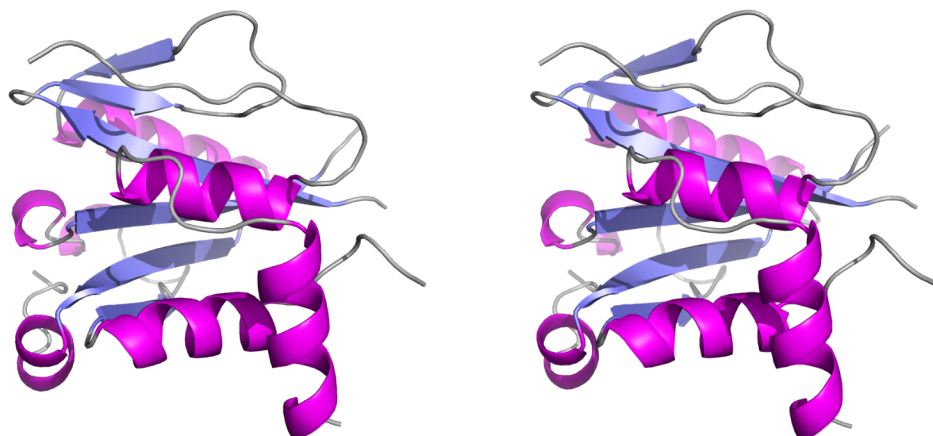

B.

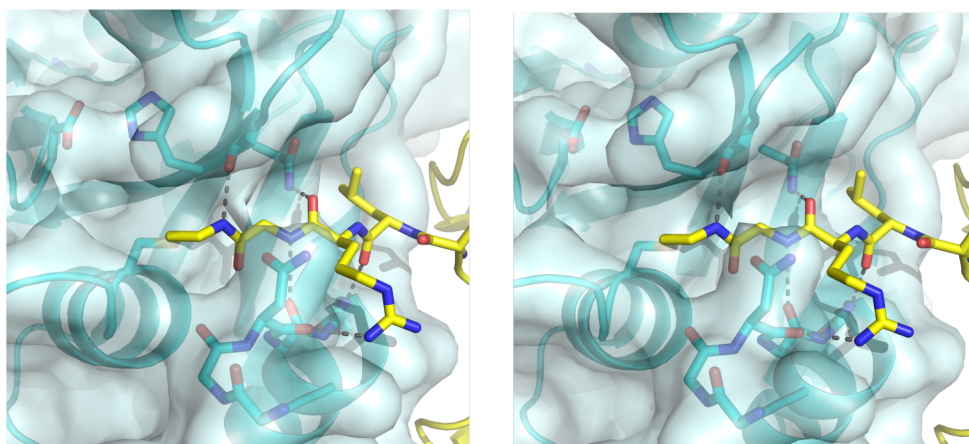

**Figure S1.** Divergent (wall-eyed) stereo views of the Josephin-2 structure. (A) Stereo version of Figure 1A (note that loop smoothing has been turned off in the stereo figure, leading to more complex paths for the regions of irregular secondary structure). (B) Stereo version of Figure 2C.

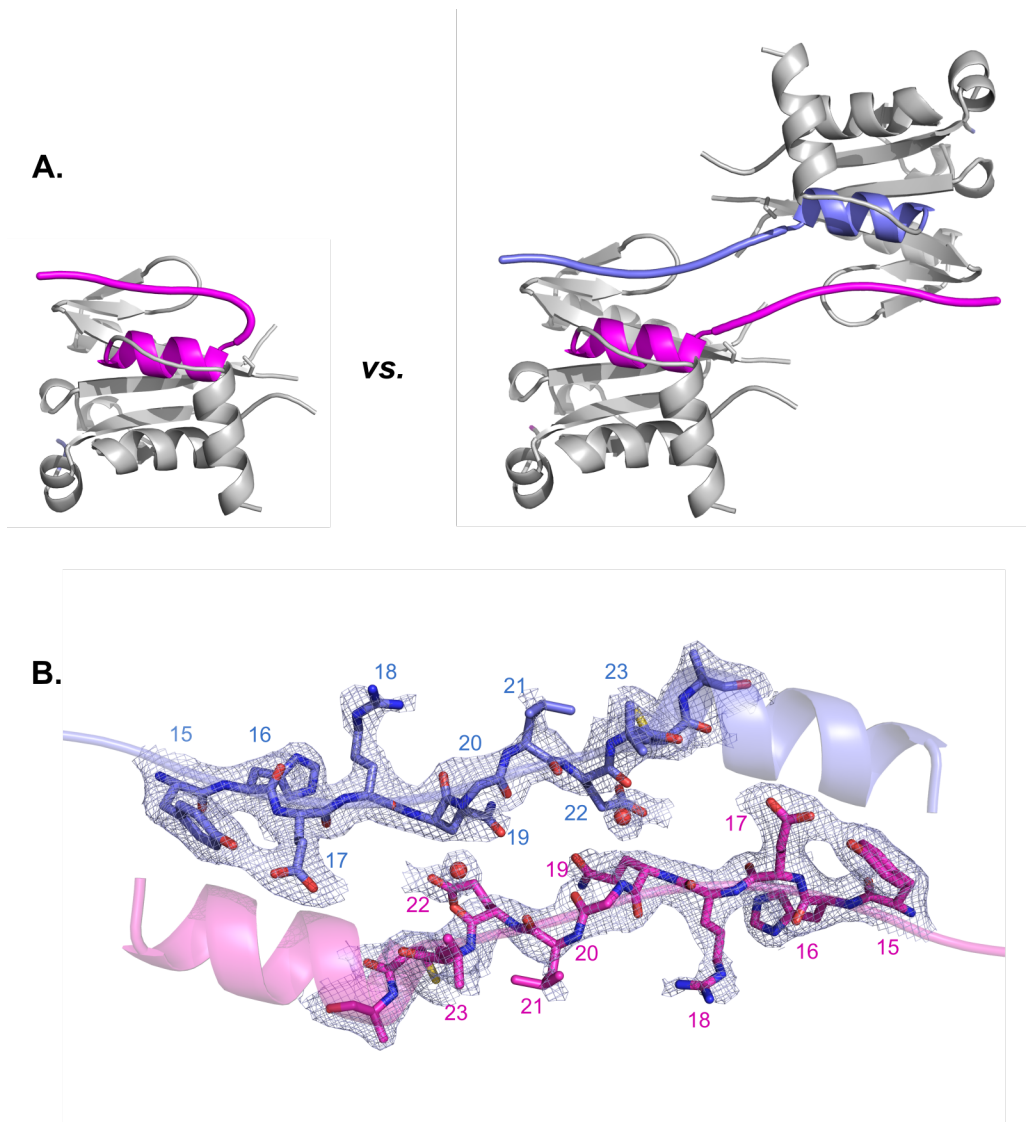

**Figure S2.** Domain swapping in the Josephin-2 crystal structure. (A) Schematic representation of the non-domain-swapped structure (left) versus the domain-swapped version (right). The magenta portion of the chain represents residues 12-34 in one molecule, while the blue chain represents the corresponding stretch of residues in a symmetry-related molecule. (B) An omit map calculated by omitting residues 18-22, corresponding to the point of crossover for the domain swap. This view is shown in the same orientation as panel A. The map is contoured at  $0.9 \sigma$ .

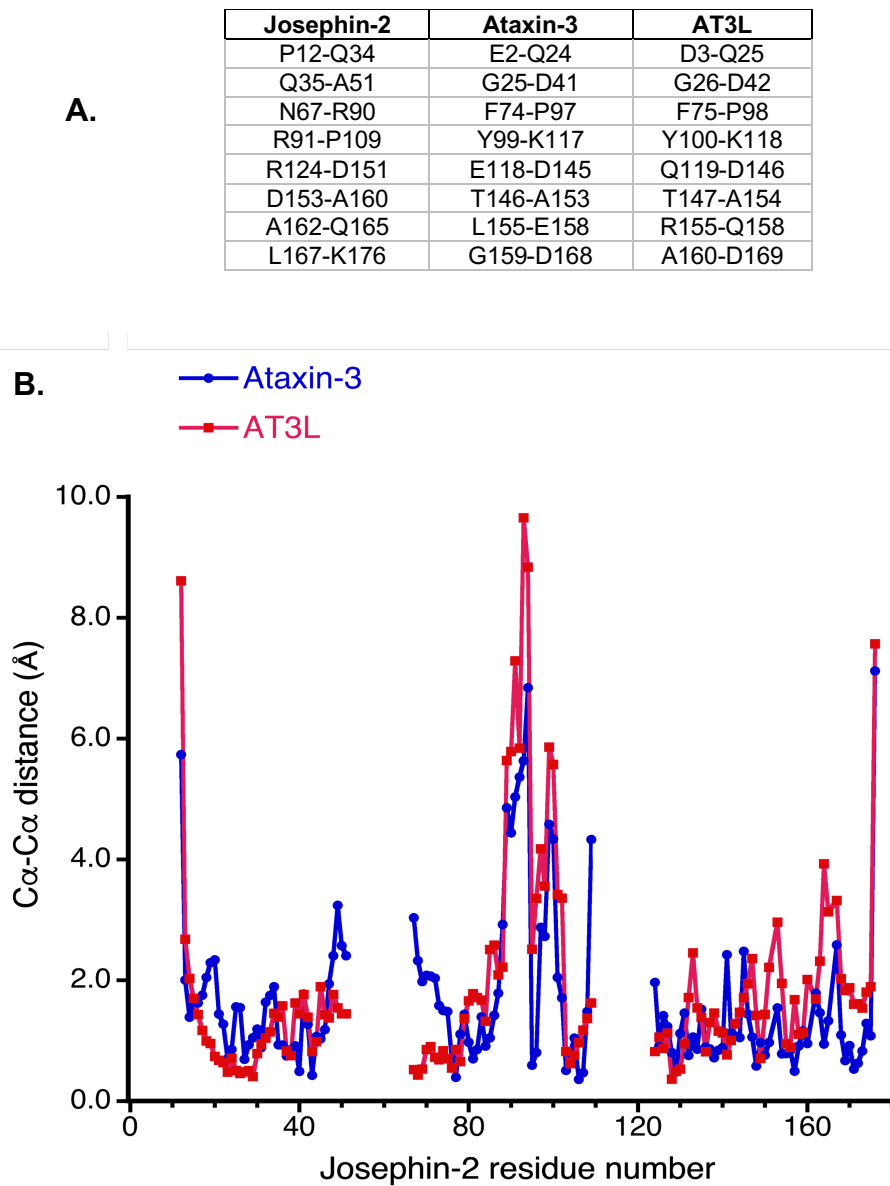

**Figure S3.** Differences in C $\alpha$  positions after superposition: Josephin-2 vs. ataxin-3 & Josephin-2 vs. AT3L. (A) Table showing equivalent residue ranges used for superpositions. These correspond to the alignments (produced by TM-align) shown in Figure 1. A total of 132 equivalent residue pairs were included in each superposition. (B) C $\alpha$ -to-C $\alpha$  distance after superposition. Josephin-2 vs. ataxin-3, blue; Josephin-2 vs. AT3L, red. Superpositions were carried out using LSQKAB (Kabsch, 1976).

```

Jos2          HHHHHHHHHH      HHHHHHHHHH          HHHHHHHHHH      EEEEE      GGG
AT3          HHHHHHHHHH      HHHHHHHHHHHHHHHHHHHHH      HHHHHHH      HHHHHHH      EEEE
AT3L        HHHHHHHHHH      HHHHHHHHHHHHHHHHHHHHH      HHHHHHH      HHHHHHH      EEEE      HHHH
Jos2  MSQAPGAQPSPTVYHERQRLELCAVHALNNVLQQQLFSQEADEICKRLA-----PDSRLNPH-RSL LGTG-NYDVNVVIMAAALQGLGLAAVWDRR-RPLSQA
AT3   -----MESIFHEKQEGSLCAQHCLNLLQGEYFSPVELSSIAHQLDEEERMRMAEGGVTSEDYRTFLQQP-SGNMDDSGFFSIQVISNALKVWGLELILFNSPEYQRLRID
AT3L  -----MDFIFHEKQEGFLCAQHCLNLLQGEYFSPVELASIAHQLDEEERMRMAEGGVTSEEYLAFLQQP-SENMDDTGFFSIQVISNALKFWGLELIHFNNPEYQKLGID

Jos2  GGG  EEEEEEE      EEEEEEE      EEEE      EEEE  HHHHHHHHHHHHH      EEEEEHHHHHH
AT3   GGG  EEEEE      EEEEEEE      EEEEE      EEE  H-HHHHHHHHHHHHH      EEEEE      HHHH
AT3L  GGG  EEEEE      EEEEEEE      EEEE      EEE  H-HHHHHHHC-GGG  EEEEE      HHHHHH
Jos2  LPQVLGLILNLPSPVSLGLLSLPLRRRHVVALRQVDGVYVNLDSKLRAPALGDEGDGVRAFLAAALAQGLCEVLLVVTKEVEEKGSWLRTD-
AT3   PINERSFICNYK-----EHWFTVRKLGKQWFNLNSLLTGPELISD-TYLALFLAQLQQE-GYSIFVVKGD-----LPDCEADQLLQIR
AT3L  PINERSFICNYK-----QHWFTIRKFGKHFNLNSLLAGPELISD-TCLANFLA-RLQQQAYSVFVVKGD-----LPDCEADQLLQI--

```

**Figure S4.** Secondary structure comparison between Josephin-2, ataxin-3, and AT3L. DSSP (Kabsch & Sander, 1983; Touw *et al.*, 2015) was used to perform secondary structure analyses on Josephin-2 (this work), ataxin-3 (PDB code 1YZB), and AT3L (PDB code 3O65). The results of the DSSP analysis are shown above the aligned sequences. The nomenclature used follows the DSSP convention:

*H*     alpha helix  
*E*     extended  
*G*      $3_{10}$  helix

## References

- Kabsch, W., 1976. A solution for the best rotation to relate two sets of vectors. *Acta Crystallogr.* A32, 922-923.
- Kabsch, W. & Sander, C., 1983. Dictionary of protein secondary structure: pattern recognition of hydrogen-bonded and geometrical features. *Biopolymers* 22, 2577-2637.
- Touw, W. G., Baakman, C., Black, J., te Beek, T. A. H., Krieger, E., Joosten, R. P., Vriend, G., 2015. A series of PDB-related databases for everyday needs. *Nucleic Acids Res.* 43, D364-D368.
